# Supplementary material for: Effects on Child Development and Parent–Child Interaction of the FACAM Intervention: A Randomized Controlled Study of an Interdisciplinary Intervention to Support Women in Vulnerable Positions through Pregnancy and Early Motherhood
Source: MDPI journal article supplement (doi:10.3390/ijerph21050587), 2024-05-02
Supplement: s1 [file s1]

Supplementary Table S1 Comparison of characteristics at baseline between families with low concern and families with medium or high concern.

|                                                                               | Low concern<br>N = 240 |        | Medium or high<br>concern<br>N = 91 |        | Difference |         |
|-------------------------------------------------------------------------------|------------------------|--------|-------------------------------------|--------|------------|---------|
|                                                                               | Mean                   | SD     | Mean                                | SD     | T-stat     | p-value |
| Mother age                                                                    | 30.48                  | (5.32) | 27.42                               | (5.50) | 4.64       | 0.00    |
| Mother health                                                                 | 7.00                   | (1.81) | 7.48                                | (1.72) | -2.18      | 0.03    |
| Mother life satisfaction                                                      | 7.71                   | (1.83) | 7.79                                | (1.95) | -0.36      | 0.72    |
| Mother well-being                                                             | 23.54                  | (3.89) | 24.33                               | (4.51) | -1.58      | 0.11    |
| Ever lonely                                                                   | 2.48                   | (0.92) | 2.54                                | (0.95) | -0.52      | 0.60    |
| Access to practical help                                                      | 3.99                   | (1.05) | 4.21                                | (0.98) | -1.74      | 0.08    |
| Access to somebody to talk to                                                 | 4.54                   | (0.83) | 4.53                                | (0.85) | 0.14       | 0.89    |
| HADS-anxiety                                                                  | 6.89                   | (3.75) | 6.52                                | (4.11) | 0.78       | 0.43    |
| HADS-depression                                                               | 4.59                   | (3.36) | 3.89                                | (3.03) | 1.73       | 0.08    |
| PTSD total score                                                              | 13.62                  | (5.86) | 14.71                               | (6.25) | -1.49      | 0.14    |
| ECR: Fear of abandonment                                                      | 18.95                  | (7.12) | 19.05                               | (6.85) | -0.12      | 0.90    |
| ECR: Fear of intimacy                                                         | 13.50                  | (6.55) | 13.84                               | (7.11) | -0.40      | 0.69    |
| PPRFQ opacity of mental states                                                | 4.62                   | (1.23) | 4.51                                | (1.36) | 0.68       | 0.50    |
| PPRFQ reflecting on the fetus-child                                           | 4.92                   | (1.05) | 5.40                                | (0.86) | -3.76      | 0.00    |
| PPRFQ the dynamic nature of<br>mental states                                  | 4.46                   | (1.08) | 4.44                                | (1.14) | 0.14       | 0.89    |
| ACE total score                                                               | 2.23                   | (2.10) | 2.98                                | (2.48) | -2.63      | 0.01    |
| Units of alcohol prior to pregnancy                                           | 1.52                   | (1.97) | 1.46                                | (2.50) | 0.24       | 0.81    |
| Units of alcohol during pregnancy                                             | 0.03                   | (0.18) | 0.00                                | (0.00) | 1.31       | 0.19    |
| Expecting first child                                                         | 0.60                   | (0.49) | 0.69                                | (0.46) | -1.62      | 0.11    |
| Cohabit with partner                                                          | 0.86                   | (0.35) | 0.71                                | (0.45) | 3.07       | 0.00    |
| Only speak Danish at home                                                     | 0.83                   | (0.38) | 0.80                                | (0.40) | 0.57       | 0.57    |
| High school or less                                                           | 0.31                   | (0.46) | 0.69                                | (0.46) | -6.73      | 0.00    |
| Vocational or secondary education                                             | 0.23                   | (0.42) | 0.16                                | (0.37) | 1.20       | 0.23    |
| College, Bachelor, tertiary or longer<br>education                            | 0.47                   | (0.50) | 0.14                                | (0.35) | 5.67       | 0.00    |
| Employed                                                                      | 0.42                   | (0.49) | 0.21                                | (0.41) | 3.58       | 0.00    |
| Sick leave                                                                    | 0.20                   | (0.40) | 0.10                                | (0.30) | 2.11       | 0.04    |
| Unemployment benefit                                                          | 0.07                   | (0.26) | 0.04                                | (0.21) | 0.89       | 0.37    |
| Social assistance/unemployment<br>program                                     | 0.08                   | (0.27) | 0.40                                | (0.49) | -7.44      | 0.00    |
| In education                                                                  | 0.19                   | (0.39) | 0.19                                | (0.39) | 0.01       | 0.99    |
| Unemployment no benefits                                                      | 0.02                   | (0.13) | 0.02                                | (0.15) | -0.32      | 0.75    |
| Smoking regularly                                                             | 0.08                   | (0.28) | 0.23                                | (0.42) | -3.70      | 0.00    |
| Never regularly used drugs like<br>hash, pot, marihuana                       | 0.93                   | (0.26) | 0.75                                | (0.44) | 4.50       | 0.00    |
| Never regularly used drugs like<br>amphetamin, ecstasy, cocaine, LSD          | 0.96                   | (0.19) | 0.90                                | (0.30) | 2.21       | 0.03    |
| Used medicine during pregnancy<br>(including non-prescriptipn<br>painkillers) | 0.63                   | (0.48) | 0.54                                | (0.50) | 1.58       | 0.12    |
| Expect to breast feed                                                         | 0.97                   | (0.17) | 0.95                                | (0.22) | 0.72       | 0.48    |

Supplementary Table S2 Interaction analyses with regression coefficients and p-values.

|                                              | Add. effect of mother having at more than high school education |      | Add. effect of mother having high level of concern |      | Add. Effect of mother having high trauma level |      |
|----------------------------------------------|-----------------------------------------------------------------|------|----------------------------------------------------|------|------------------------------------------------|------|
|                                              | b                                                               | P    | b                                                  | P    | b                                              | P    |
| ASQ:SE-2 Totalscore                          | -7.20                                                           | 0.10 | -4.51                                              | 0.34 | -0.17                                          | 0.97 |
| ASQ:SE-2 Totalscore incl. worries            | -4.11                                                           | 0.43 | 3.02                                               | 0.58 | -5.00                                          | 0.32 |
| Child activities                             | -0.27                                                           | 0.15 | -0.24                                              | 0.26 | -0.25                                          | 0.16 |
| The Mother and Baby Interaction Scale        | -0.64                                                           | 0.58 | 0.00                                               | 1.00 | 0.14                                           | 0.90 |
| CIB: Sensitivity                             | -0.01                                                           | 0.94 | 0.09                                               | 0.55 | 0,27                                           | 0.19 |
| CIB: Intrusiveness                           | -0.24                                                           | 0.18 | -0.10                                              | 0.55 | 0,09                                           | 0.73 |
| CIB: Limit-setting                           | -0.26                                                           | 0.08 | -0.31                                              | 0.04 | -0,38                                          | 0.07 |
| CIB: Involvement                             | 0.05                                                            | 0.52 | -0.25                                              | 0.06 | -0,53                                          | 0.02 |
| CIB: Withdrawal                              | 0.21                                                            | 0.01 | 0.10                                               | 0.51 | -0,26                                          | 0.34 |
| CIB: Compliance                              | 0.04                                                            | 0.63 | 0.07                                               | 0.58 | 0,26                                           | 0.21 |
| CIB: Reciprocity                             | 0.26                                                            | 0.19 | 0.19                                               | 0.34 | 0,14                                           | 0.30 |
| CIB: Negative states                         | -0.11                                                           | 0.65 | -0.28                                              | 0.22 | -0,10                                          | 0.55 |
| BSID: Cognitive scale                        | 1.09                                                            | 0.15 | 0.65                                               | 0.36 | 0.21                                           | 0.77 |
| BSID: Receptive language scale               | 1.12                                                            | 0.25 | -0.37                                              | 0.56 | -0.38                                          | 0.62 |
| BSID: expressive language scale              | 1.19                                                            | 0.11 | 0.70                                               | 0.59 | 0.28                                           | 0.80 |
| BSID: Language scale                         | -0.69                                                           | 0.39 | 1.33                                               | 0.31 | 0.58                                           | 0.45 |
| BSID: Fine motor scale                       | 0.78                                                            | 0.35 | -1.06                                              | 0.38 | 0.41                                           | 0.75 |
| BSID: Gross motor scale                      | -0.50                                                           | 0.53 | 0.48                                               | 0.53 | 0.26                                           | 0.88 |
| BSID: Motor scale                            | 1.15                                                            | 0.11 | 0.14                                               | 0.88 | 0.68                                           | 0.58 |
| SEAM: Empathy                                | -1.63                                                           | 0.35 | -1.51                                              | 0.44 | -1.20                                          | 0.56 |
| SEAM: Selfregulation and positive self-image | -0.23                                                           | 0.78 | -1.08                                              | 0.32 | -0.24                                          | 0.82 |
| Observations                                 | Survey outcomes N=324, CIB N = 194, BSID N = 196, SEAM N = 164  |      |                                                    |      |                                                |      |

Supplementary Table S3 Sensitivity analyses.

|                                       | Complete case           |      |                           |      | Instrumental variable analysis |      |                           |      |
|---------------------------------------|-------------------------|------|---------------------------|------|--------------------------------|------|---------------------------|------|
|                                       | T2 child age 3-6 months |      | T3 child age 12-14 months |      | T2 child age 3-6 months        |      | T3 child age 12-14 months |      |
|                                       | b                       | P    | b                         | P    | b                              | P    | b                         | P    |
| Child health                          | -0.07                   | 0.63 |                           |      | -0.08                          | 0.62 |                           |      |
| ASQ:3 Communication                   | -0.28                   | 0.81 |                           |      | -0.32                          | 0.81 |                           |      |
| ASQ:3 Gross motor                     | -0.10                   | 0.93 |                           |      | -0.11                          | 0.93 |                           |      |
| ASQ:3 Fine motor                      | 1.29                    | 0.47 |                           |      | 1.44                           | 0.46 |                           |      |
| ASQ:3 Problem solving                 | -0.18                   | 0.90 |                           |      | -0.21                          | 0.90 |                           |      |
| ASQ:3 Personal-social                 | -0.69                   | 0.63 |                           |      | -0.77                          | 0.63 |                           |      |
| ASQ:SE Totalscore                     | -0.10                   | 0.96 | -0.54                     | 0.80 | -0.12                          | 0.96 | -0.61                     | 0.80 |
| ASQ:SE Totalscore incl. worries       | 0.64                    | 0.84 | 0.25                      | 0.92 | 0.71                           | 0.84 | 0.29                      | 0.92 |
| Child activities                      |                         |      | 0.08                      | 0.40 |                                |      | 0.09                      | 0.39 |
| The Mother and Baby Interaction Scale |                         |      | 1.05                      | 0.05 |                                |      | 1.18                      | 0.05 |
| CIB: Sensitivity                      |                         |      |                           |      | -0.13                          | 0.15 | -0.07                     | 0.37 |
| CIB: Intrusiveness                    |                         |      |                           |      | 0.04                           | 0.53 | 0.04                      | 0.26 |
| CIB: Limit-setting                    |                         |      |                           |      | -0.06                          | 0.60 | -0.16                     | 0.13 |

|                                              |        |       |                            |      |                                                       |      |
|----------------------------------------------|--------|-------|----------------------------|------|-------------------------------------------------------|------|
| CIB: Involvement                             |        |       | -0.27                      | 0.00 | -0.09                                                 | 0.24 |
| CIB: Withdrawal                              |        |       | 0.16                       | 0.06 | 0.07                                                  | 0.28 |
| CIB: Compliance                              |        |       |                            |      | -0.11                                                 | 0.30 |
| CIB: Reciprocity                             |        |       | -0.17                      | 0.14 | -0.11                                                 | 0.32 |
| CIB: Negative states                         |        |       | 0.20                       | 0.07 | 0.13                                                  | 0.23 |
| BSID: Cognitive scale                        |        |       |                            |      | -0.47                                                 | 0.22 |
| BSID: Receptive language scale               |        |       |                            |      | -0.38                                                 | 0.35 |
| BSID: expressive language scale              |        |       |                            |      | -0.12                                                 | 0.72 |
| BSID: Language scale                         |        |       |                            |      | -0.41                                                 | 0.51 |
| BSID: Fine motor scale                       |        |       |                            |      | 0.69                                                  | 0.07 |
| BSID: Gross motor scale                      |        |       |                            |      | 0.38                                                  | 0.36 |
| BSID: Motor scale                            |        |       |                            |      | 1.21                                                  | 0.07 |
| SEAM: Empathy                                |        |       |                            |      | -0.34                                                 | 0.83 |
| SEAM: Selfregulation and positive self-image |        |       |                            |      | -0.05                                                 | 0.94 |
| Observations                                 | N =284 | N=248 | Survey N = 284,<br>CIB=189 |      | Survey N = 248,<br>CIB=194, BSID =<br>196, SEAM = 164 |      |

---
